# Supplementary material
Source: PubMed Central journal article supplement (PMC4974140)
Supplement: NIHMS802589-supplement-Supplemental_Data.pdf [file NIHMS802589-supplement-Supplemental_Data.pdf]

**Supplemental Table 1** Univariate/Multivariate Analysis of Risk Factors Associated with Loco-regional Recurrence

|                                     | Univariate analysis |         | Multivariate analysis |         |
|-------------------------------------|---------------------|---------|-----------------------|---------|
|                                     | OR (95%CI)          | P value | OR (95%CI)            | P value |
| <b>Age</b>                          | 1.02 (0.99-1.05)    | 0.24    | -                     |         |
| <b>Male sex</b>                     | 1.35 (0.60-3.03)    | 0.46    | -                     |         |
| <b>Tumor size</b>                   | 1.03 (0.94-1.12)    | 0.55    | -                     |         |
| <b>Hormone Functional</b>           | 1.82 (0.79-4.22)    | 0.16    | -                     |         |
| <b>Laterality</b>                   |                     |         |                       |         |
| Right                               | Ref                 |         | Ref                   |         |
| Left                                | 2.69 (1.18-6.14)    | 0.02    | 2.71 (1.06-6.89)      | 0.04    |
| <b>T Stage</b>                      |                     |         |                       |         |
| T1/T2                               | Ref                 |         | Ref                   |         |
| T3/T4                               | 2.77 (1.14-6.71)    | 0.02    | 3.04 (1.19-7.80)      | 0.02    |
| <b>Capsular invasion</b>            | 1.48 (0.55-3.99)    | 0.44    | -                     |         |
| <b>N stage</b>                      |                     |         |                       |         |
| N0                                  | Ref                 |         | -                     |         |
| N1                                  | 3.33 (0.59-18.9)    | 0.17    | -                     |         |
| Nx                                  | 1.22 (0.42-3.61)    | 0.71    | -                     |         |
| <b>Number of positive LN</b>        | 1.11 (0.73-1.68)    | 0.63    | -                     |         |
| <b>Operation type</b>               |                     |         |                       |         |
| Open abdominal or posterior         | Ref                 |         | -                     |         |
| Minimally invasive Surgery          | 0.57 (0.21-1.57)    | 0.28    | -                     |         |
| Thoraco-abdominal Surgery           | 0.93 (0.24-3.60)    | 0.92    | -                     |         |
| <b>Multi organ resection</b>        | 0.58 (0.23-1.42)    | 0.23    | -                     |         |
| <b>Tumor rupture during surgery</b> | 0.36 (0.04-3.26)    | 0.37    | -                     |         |
| <b>Margin</b>                       |                     |         |                       |         |
| R0                                  | Ref                 |         | -                     |         |
| R1                                  | 1.08 (0.67-1.76)    | 0.75    | -                     |         |
| <b>Adjuvant chemotherapy</b>        | 1.78 (0.53-5.98)    | 0.35    | -                     |         |
| <b>Adjuvants Radiotherapy</b>       | 0.72 (0.13-3.93)    | 0.70    | -                     |         |
| <b>Adjuvant Mitotane</b>            | 1.11 (0.43-2.90)    | 0.83    | -                     |         |

**Supplemental Table 2** Univariate/Multivariate Analysis of Risk Factors Associated with Distant Recurrence

|                                     | <b>Univariate analysis</b> |         | <b>Multivariate analysis</b> |         |
|-------------------------------------|----------------------------|---------|------------------------------|---------|
|                                     | OR (95%CI)                 | P value | OR (95%CI)                   | P value |
| <b>Tumor size</b>                   | 1.12 (1.03-1.21)           | 0.003   | 1.11 (1.01-1.24)             | 0.04    |
| <b>Hormone Functional</b>           | 1.43 (0.64-3.18)           | 0.37    | -                            |         |
| <b>Laterality</b>                   |                            |         |                              |         |
| Right                               | Ref                        |         |                              |         |
| Left                                | 1.46 (0.69-3.06)           | 0.31    |                              |         |
| <b>T Stage</b>                      |                            |         |                              |         |
| T1/T2                               | Ref                        |         | Ref                          |         |
| T3/T4                               | 4.39 (1.96-9.84)           | <0.001  | 5.23 (1.70-16.10)            | 0.004   |
| <b>Capsular invasion</b>            | 2.95 (1.18-7.40)           | 0.02    | 1.51 (0.48-4.64)             | 0.47    |
| <b>N stage</b>                      |                            |         |                              |         |
| N0                                  | Ref                        |         |                              |         |
| N1                                  | 0.31 (0.03-3.38)           | 0.34    | -                            |         |
| Nx                                  | 0.70 (0.28-1.70)           | 0.43    |                              |         |
| <b>Number of positive LN</b>        | 0.71 (0.37-1.38)           | 0.31    |                              |         |
| <b>Tumor rupture during surgery</b> | 1.73 (0.51-5.89)           | 0.38    |                              |         |
| <b>Operation type</b>               |                            |         |                              |         |
| Open abdominal or posterior         | Ref                        |         |                              |         |
| Minimally invasive Surgery          | 0.67 (0.26-1.71)           | 0.41    | -                            |         |
| Thoraco-abdominal Surgery           | 2.47 (0.82-7.44)           | 0.11    | -                            |         |
| <b>Margin</b>                       |                            |         |                              |         |
| R0                                  | Ref                        |         |                              |         |
| R1                                  | 0.81 (0.49-1.27)           | 0.38    | -                            |         |
| <b>Multiple organ resection</b>     | 1.67 (0.77-3.61)           | 0.19    |                              |         |
| <b>Adjuvant chemotherapy</b>        | 1.80 (0.58-5.61)           | 0.30    |                              |         |
| <b>Adjuvants Radiotherapy</b>       | 1.41 (0.38-5.21)           | 0.61    |                              |         |
| <b>Adjuvant Mitotane</b>            | 1.46 (0.67-3.29)           | 0.36    |                              |         |
